# Supplementary material for: One-pot selective hydroconversion of levulinic acid to 2-methyltetrahydrofuran catalyzed by Ni-based catalysts derived from phyllosilicates
Source: Royal Society of Chemistry journal article supplement (doi:10.1039/d2se00330a), 2022-01-01
Supplement: d2se00330a1.pdf [file d2se00330a1.pdf]

### Supporting information

#### **One-pot selective hydroconversion of levulinic acid to 2-methyltetrahydrofuran catalyzed by Ni-based catalysts derived from phyllosilicate**

Kaiyun Lu<sup>#</sup>, Ziyi Li<sup>#</sup>, Chunhua Hai, Jifan Li\*, Chun-Ling Liu, Wen-Sheng Dong\*

*Key Laboratory of Applied Surface and Colloid Chemistry (SNNU), MOE, School of  
Chemistry and Chemical Engineering, Shaanxi Normal University, Xi'an 710062,  
Shaanxi, China*

# Kaiyun Lu and Ziyi Li are co-first authors of this article

\*Corresponding authors. E-mail addresses: [lijifan@snnu.edu.cn](mailto:lijifan@snnu.edu.cn) (Jifan Li),  
[wsdong@snnu.edu.cn](mailto:wsdong@snnu.edu.cn) (Wen-Sheng Dong).

**Table S1** The summary of the hydrogenation of LA/GVL to 2-MTHF over base metal catalysts in representative literatures.

| Entry Ref. | Catalyst                                       | Substrate | Reaction conditions | Conversion | Selectivity | Productivity (mmol·2-MTHF/h·g·cat. |
|------------|------------------------------------------------|-----------|---------------------|------------|-------------|------------------------------------|
| 1          | Ni(8)–Cu(72)/SiO <sub>2</sub>                  | LA        | 265 °C, 2.5 MPa     | 100%       | 89%         | 3.93 mmol/h/g                      |
| 2          | 30Cu/ZrO <sub>2</sub> –OG                      | GVL       | 240 °C, 6.0 MPa     | 98%        | 93%         | 7.59 mmol/h/g                      |
| 3          | 23Ni–12Cu/Al <sub>2</sub> O <sub>3</sub>       | LA        | 250 °C, 7.0 MPa     | 100%       | 56%         | 9.64 mmol/h/g                      |
| 4          | 23Ni–12Cu/Al <sub>2</sub> O <sub>3</sub>       | LA        | 250 °C, 4.0 MPa     | 100%       | 80%         | 3.45 mmol/h/g                      |
| 5          | 20%Ni–Cu/Al <sub>2</sub> O <sub>3</sub> –cp450 | GVL       | 230 °C, 5.0 MPa     | 80%        | 80%         | 12.78 mmol/h/g                     |
| 6          | 10%Cu–10%Ni/Al–Zr(9)                           | LA        | 220 °C, 3.0 MPa     | 100%       | 99.8%       | 4.30 mmol/h/g                      |
| 7          | Ni/SiO <sub>2</sub>                            | LA        | 250 °C, 3.0 MPa     | 99.9%      | 56.2%       | 4.84 mmol/h/g                      |
| 8          | 10Cu–5Ni/Al <sub>2</sub> O <sub>3</sub>        | LA        | 180 °C, 4.0 MPa     | 100%       | 98%         | 2.04 mmol/h/g                      |
| 9          | NiSi–SL                                        | LA        | 220 °C, 5.0 MPa     | 100%       | 62%         | 5.34 mmol/h/g                      |

1. *ChemSusChem*, 2011, **4**, 1749–1752
2. *Green Chem.*, 2012, **14**, 935–939
3. *ChemSusChem*, 2015, **8**, 3483–3488
4. *ChemSusChem*, 2016, **9**, 2488–2495
5. *Appl. Catal. B Environ.*, 2017, **210**, 328–341
6. *Green Chem.*, 2019, **21**, 606–613
7. *Mechanisms and Catal.*, 2019, **126**, 795–810
8. *ACS Sustainable Chem. Eng.*, 2020, **8**, 11477–11490
9. *This work*
